# Supplementary material for: Water-soluble MoS2 quantum dots for facile and sensitive fluorescence sensing of alkaline phosphatase activity in serum and live cells based on the inner filter effect
Source: Royal Society of Chemistry journal article supplement (doi:10.1039/c8nr05549a), 2018-01-01
Supplement: c8nr05549a1.pdf [file c8nr05549a1.pdf]

## Electronic Supplementary Information

**Water-soluble MoS<sub>2</sub> quantum dots for facile and sensitive fluorescent sensing of alkaline phosphatase activity in serum and live cells based on inner filter effect**

Yaping Zhong,<sup>a</sup> Fengfeng Xue,<sup>a</sup> Peng Wei,<sup>a</sup> Ruohan Li,<sup>a</sup> Chunyan Cao,<sup>a</sup> Tao Yi<sup>\*a</sup>

<sup>a</sup>Department of Chemistry and Collaborative Innovation Center of Chemistry for Energy Materials, Fudan University, Shanghai 200438, China

\* Corresponding author

E-mail addresses: yitao@fudan.edu.cn (T. Yi)

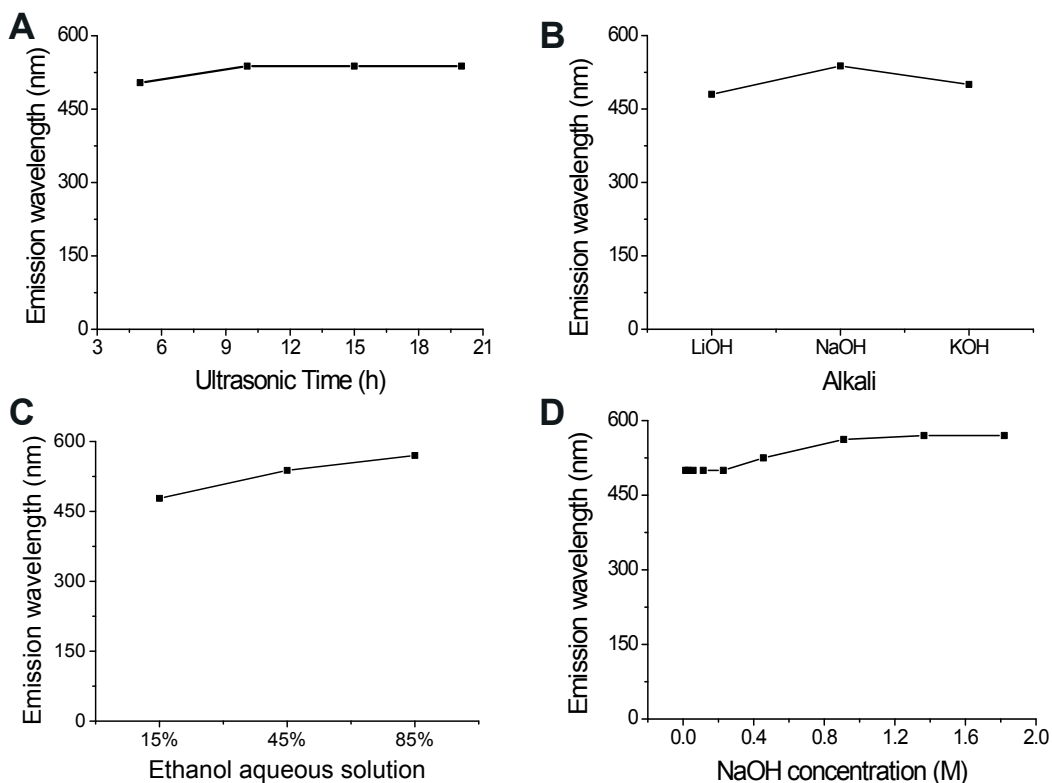

**Figure S1.** The emission wavelength of MoS<sub>2</sub> QDs prepared under (A) different ultrasonic time (5 to 20 h), (B) 0.4 g different alkalis (LiOH, NaOH, KOH), (C) 11 mL different ethanol aqueous solution (15%, 45% and 85%) and (D) different NaOH concentrations (0.140 mol/L to 1.820 mol/L).

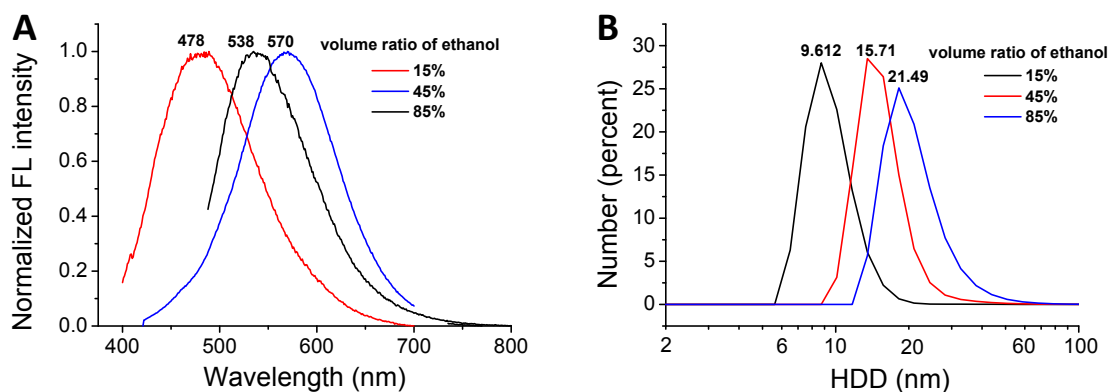

**Figure S2.** (A) The best fluorescence emission spectra and (B) hydrodynamic diameter (HDD) of MoS<sub>2</sub> QDs synthesized under different volume ratio of ethanol (15%-85%).

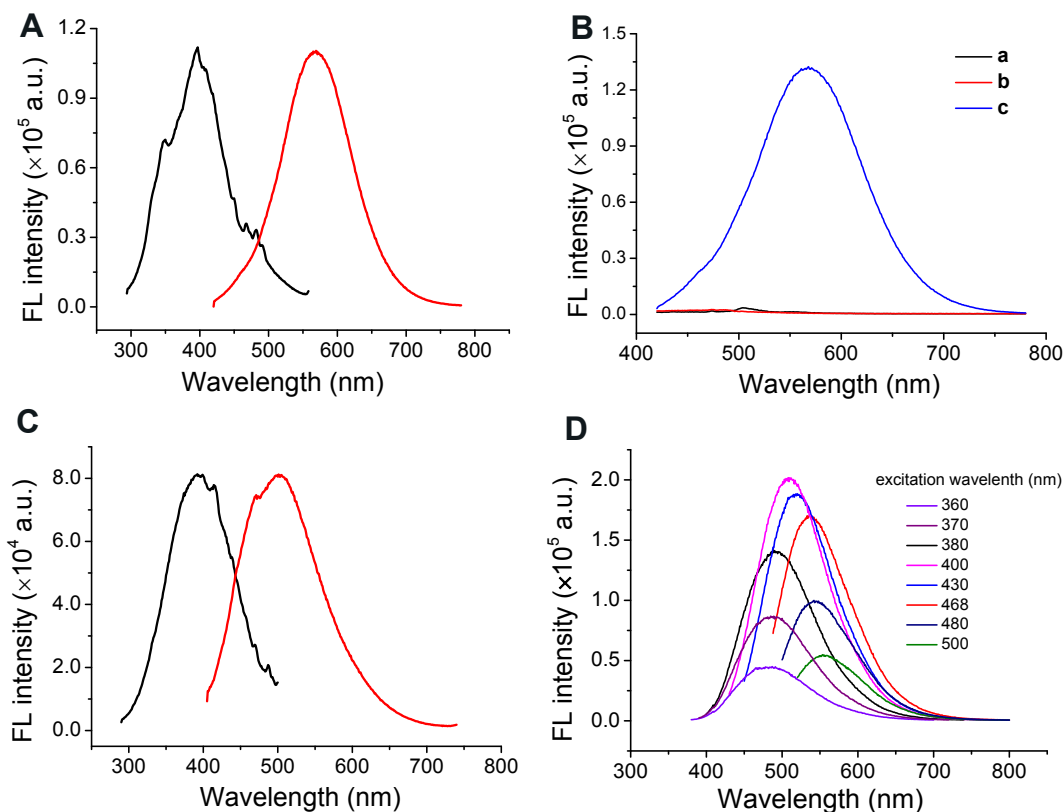

**Figure S3.** (A) Fluorescence excitation and emission spectra of MoS<sub>2</sub> QDs in the reaction solution (85 vol% ethanol alkaline aqueous solution), (B) fluorescence emission spectra of the reaction solution under different synthesis procedures (in the presence of a) NaOH, b) MoS<sub>2</sub> and c) both MoS<sub>2</sub> and NaOH), (C) fluorescence excitation and emission spectra of MoS<sub>2</sub> QDs after post-treatment (neutral aqueous solution) and (D) excitation depend emission spectra of MoS<sub>2</sub> QDs in neutral aqueous solution (excitation from 360 nm to 500 nm). The black line and red line in A and C refers to the excitation and emission spectrum, respectively.

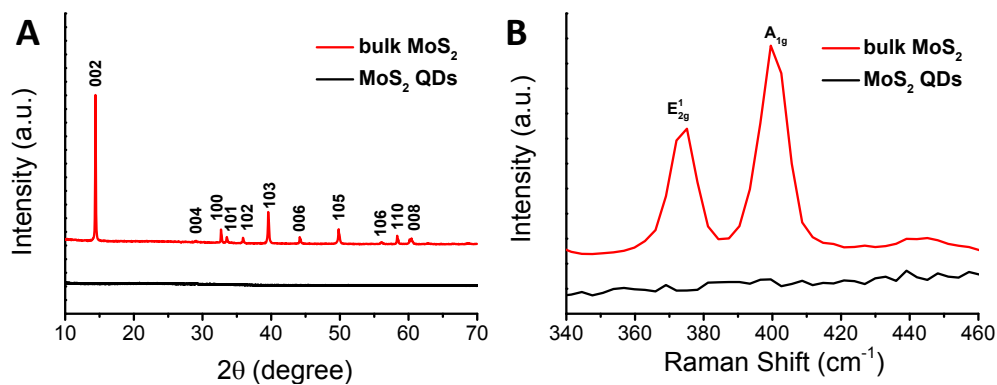

**Figure S4.** (A) XRD patterns and (B) Raman spectra of bulk MoS<sub>2</sub> powder (red line) and MoS<sub>2</sub> QDs (black line).

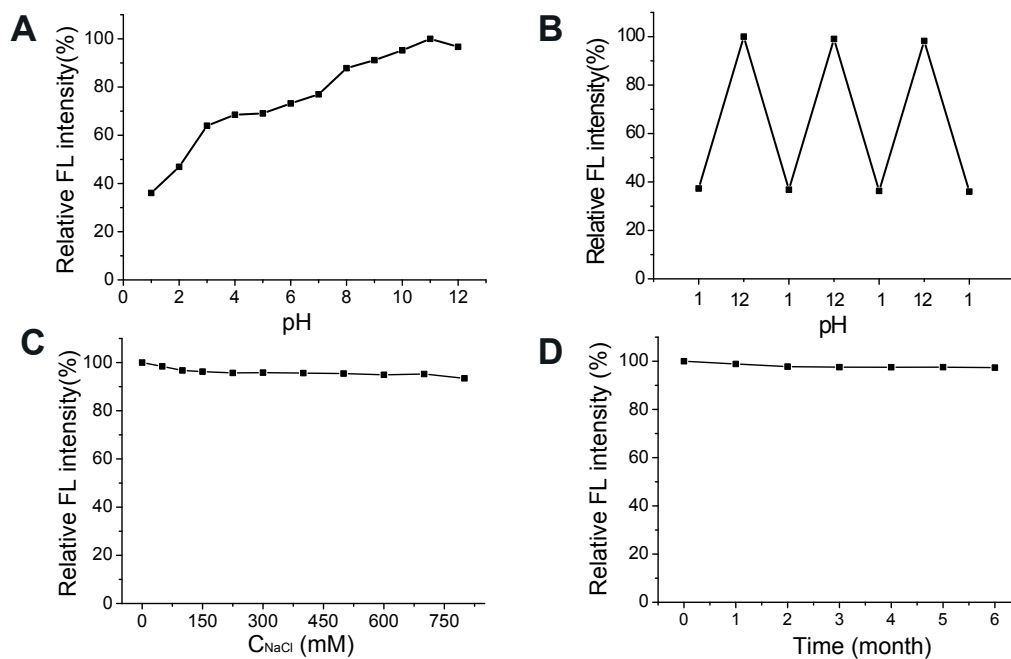

**Figure S5.** The FL intensity change of MoS<sub>2</sub> QDs (A) under different pH range (1-12), (B) from pH 1 to pH 12 for different circles, (C) under different NaCl concentration (0-800 mM) and (D) under different storage time (0-6 month).

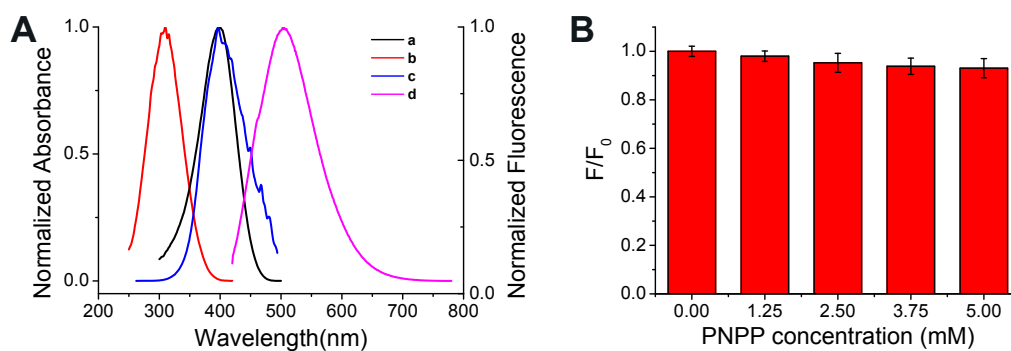

**Figure S6.** (A) Absorption spectrum of (a) p-nitrophenol, (b) p-nitrophenylphosphat and fluorescece (c) excitation spectrum, (d) emission spectrum of MoS<sub>2</sub> QDs. (B) The fluorescence change of MoS<sub>2</sub> QDs upon addition of various concentrations of PNPP from 0 to 5 mM.

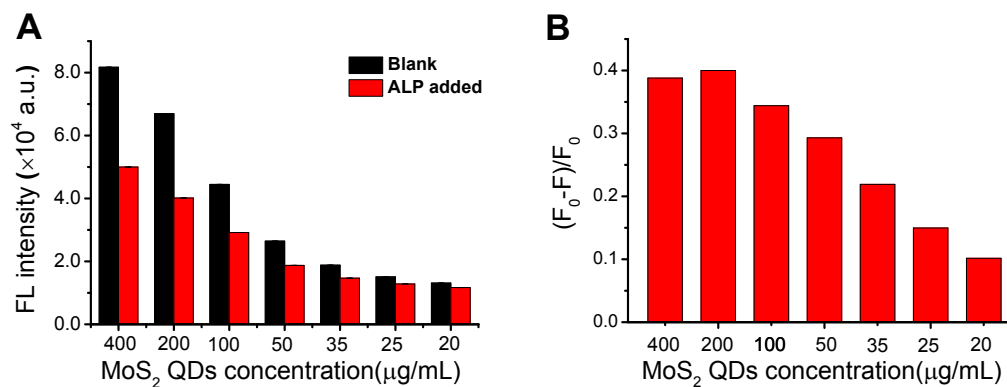

**Figure S7.** The influence of MoS<sub>2</sub> QDs concentration on the (A) fluorescence intensity and (B) fluorescence quenching efficiency of the reaction system when 10 U/L ALP was added.

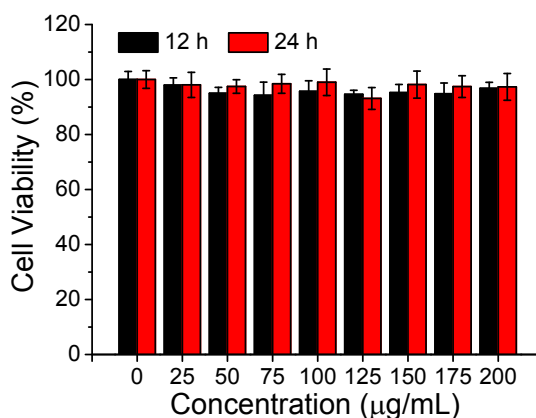

**Figure S8.** Cell viabilities of MoS<sub>2</sub> QDs using MCF-7 cells as tested model. Cells were treated by 0-200  $\mu\text{g/mL}$  of MoS<sub>2</sub> QDs for 12 h and 24 h. Data were expressed as the means  $\pm$  SD of data obtained from triplicate experiments.

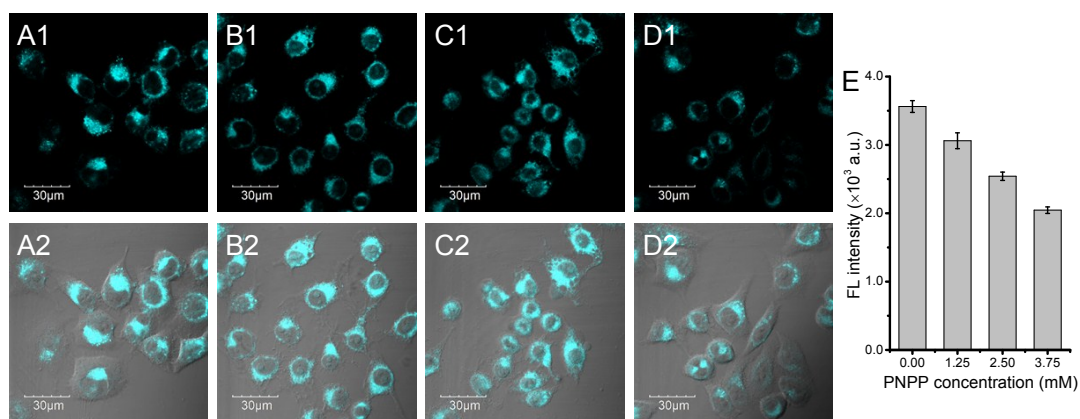

**Figure S9.** Confocal fluorescence microscopy of MoS<sub>2</sub> QDs (100 μg/mL) applied to ALP sensing in MCF-7 cells. Fluorescent images and merged fluorescent images of MoS<sub>2</sub> QDs located MCF-7 cells in the presence of (A1-A2) 0 mM PNPP, (B1-B2) 1.25 mM PNPP, (C1-C2) 2.5 mM PNPP and (D1-D2) 3.75 mM PNPP with an incubation time of 2 h. (E) Mean FL intensity of MCF-7 cells with different concentrations of PNPP in A-D (0-3.75 mM). The emission intensities collected in optical windows were collected at 475-525 nm upon the excitation at 405 nm for MoS<sub>2</sub> QDs.

**Table S1 Comparison of performance of the new method with other reported ones.**

| Method | Materials used             | Linear range (U/L) | Detection limit (U/L)        | Application              |              | Ref.      |
|--------|----------------------------|--------------------|------------------------------|--------------------------|--------------|-----------|
|        |                            |                    |                              | Human serum samples      | Cell imaging |           |
| FL     | PPI-Cu <sup>2+</sup> /CQDs | 16.7–782.6         | 1.1                          | NO                       | NO           | [1]       |
| FL     | Au NCs                     | 0.1–10             | 0.1                          | NO                       | NO           | [2]       |
| FL     | coumarin@Tb-GMP            | 25–200             | 10                           | NO                       | NO           | [3]       |
| FL     | β-CD/QDs                   | 0–800              | 10                           | NO                       | NO           | [4]       |
| FL     | PPES <sub>3</sub>          | 0–30               | 0.5                          | standard addition method | NO           | [5]       |
| FL     | SAHH-based probe           | 8–100              | 1                            | NO                       | NO           | [6]       |
| FL     | AAP/CQDs                   | 4.6–383.3          | 1.4                          | NO                       | NO           | [7]       |
| FL     | Pdots@RB-hy                | 0.005–15           | 0.0018                       | standard addition method | NO           | [8]       |
| FL     | AAP/GQDs                   | 1.0–90             | 0.14                         | standard addition method | NO           | [9]       |
| EC     | FAPP                       | –                  | 0.4                          | NO                       | NO           | [10]      |
| ECL    | PP/CdSe NPs                | 2.0–25             | 2.0                          | standard addition method | NO           | [11]      |
| EC     | PMB/HP                     | 0.1–10             | 0.1                          | NO                       | NO           | [12]      |
| Abs    | ATP/Cit-AuNPs              | –                  | 8.0                          | NO                       | NO           | [13]      |
| Abs    | AAP-Au/AgNRs               | 5.0–100            | 3.3                          | Clinical diagnosis       | NO           | [14]      |
| FL     | β-CD/CQDs                  | 3.4–100            | 0.9                          | NO                       | NO           | [15]      |
| Abs    | ATP/CTAB-AuNPs             | 100–600            | 10                           | Clinical diagnosis       | NO           | [16]      |
| FL     | PLP/AuNCs                  | 1.0–200            | 0.05                         | standard addition method | NO           | [17]      |
| FL     | MoS <sub>2</sub> QDs       | 0.1–5              | 0.1 (Lowest detect activity) | Clinical diagnosis       | Yes          | this work |

CQDs: carbon quantum dots; Au NCs: gold nanoclusters; GMP: guanine monophosphate; β-CD/QDs: β-cyclodextrin-modified quantum dots; SAHH: S-adenosylhomocysteine hydrolase; GQDs: Graphene quantum dots; FAPP: ferrocenylaminophenyl phosphate; PMB/HP: 3'-Phosphorylated methylene blue labeled hairpin probe; PP: Phenyl phosphate; FL: Fluorescence; EC: Electrochemistry; Abs: Colorimetry; ECL: Electrochemiluminescence.

## Reference

- [1] Z.S. Qian, L.J. Chai, Y.Y. Huang, C. Tang, J.J. Shen, J.R. Chen, H. Feng, A real-time fluorescent assay for the detection of alkaline phosphatase activity based on carbon quantum dots, *Biosensors and Bioelectronics* 68 (2015) 675-680.
- [2] Y. Chen, W. Li, Y. Wang, X. Yang, J. Chen, Y. Jiang, C. Yu, Q. Lin, Cysteine-directed fluorescent gold nanoclusters for the sensing of pyrophosphate and alkaline phosphatase, *Journal of Materials Chemistry C* 2 (2014) 4080-4085.
- [3] J. Deng, P. Yu, Y. Wang, L. Mao, Real-time ratiometric fluorescent assay for alkaline phosphatase activity with stimulus responsive infinite coordination polymer nanoparticles, *Analytical chemistry* 87 (2015) 3080-3086.
- [4] L. Jia, J.-P. Xu, D. Li, S.-P. Pang, Y. Fang, Z.-G. Song, J. Ji, Fluorescence detection of alkaline phosphatase activity with  $\beta$ -cyclodextrin-modified quantum dots, *Chemical Communications* 46 (2010) 7166-7168.
- [5] Y. Li, Y. Li, Z. Liu, X. Su, Sensitive fluorometric detection of alkaline phosphatase using a water-soluble conjugated polymer, *RSC Advances* 4 (2014) 42825-42830.
- [6] J.-H. Lin, W.-L. Tseng, A method for fluorescence sensing of adenosine and alkaline phosphatase based on the inhibition of S-adenosylhomocysteine hydrolase activity, *Biosensors and Bioelectronics* 41 (2013) 379-385.
- [7] Z. Qian, L. Chai, C. Tang, Y. Huang, J. Chen, H. Feng, Carbon quantum dots-based recyclable real-time fluorescence assay for alkaline phosphatase with adenosine triphosphate as substrate, *Analytical chemistry* 87 (2015) 2966-2973.
- [8] J. Sun, H. Mei, F. Gao, Ratiometric detection of copper ions and alkaline phosphatase activity based on semiconducting polymer dots assembled with rhodamine B hydrazide, *Biosensors and Bioelectronics* 91 (2017) 70-75.
- [9] H. Huang, B. Wang, M. Chen, M. Liu, Y. Leng, X. Liu, Y. Li, Z. Liu, Fluorescence turn-on sensing of ascorbic acid and alkaline phosphatase activity based on graphene quantum dots, *Sensors and Actuators B: Chemical* 235 (2016) 356-361.
- [10] S. Goggins, C. Naz, B.J. Marsh, C.G. Frost, Ratiometric electrochemical detection of alkaline phosphatase, *Chemical Communications* 51 (2015) 561-564.
- [11] H. Jiang, X. Wang, Alkaline phosphatase-responsive anodic electrochemiluminescence of CdSe nanoparticles, *Analytical chemistry* 84 (2012) 6986-6993.
- [12] L. Zhang, T. Hou, H. Li, F. Li, A highly sensitive homogeneous electrochemical assay for alkaline phosphatase activity based on single molecular beacon-initiated T7 exonuclease-mediated signal amplification, *Analyst* 140 (2015) 4030-4036.
- [13] W. Zhao, W. Chiunan, J.C. Lam, M.A. Brook, Y. Li, Simple and rapid colorimetric enzyme sensing assays using non-crosslinking gold nanoparticle aggregation, *Chemical Communications* (2007) 3729-3731.
- [14] Z. Gao, K. Deng, X.-D. Wang, M. Miró, D. Tang, High-resolution colorimetric assay for rapid visual readout of phosphatase activity based on gold/silver core/shell nanorod, *ACS applied materials & interfaces* 6 (2014) 18243-18250.
- [15] C. Tang, Z. Qian, Y. Huang, J. Xu, H. Ao, M. Zhao, J. Zhou, J. Chen, H. Feng, A fluorometric assay for alkaline phosphatase activity based on  $\beta$ -cyclodextrin-modified carbon quantum dots through host-guest recognition, *Biosensors and Bioelectronics* 83 (2016) 274-280.
- [16] C.M. Li, S.J. Zhen, J. Wang, Y.F. Li, C.Z. Huang, A gold nanoparticles-based colorimetric assay



for alkaline phosphatase detection with tunable dynamic range, *Biosensors and Bioelectronics* 43 (2013) 366-371.

- [17] M.I. Halawa, W. Gao, M. Saqib, S.A. Kitte, F. Wu, G. Xu, Sensitive detection of alkaline phosphatase by switching on gold nanoclusters fluorescence quenched by pyridoxal phosphate, *Biosensors and Bioelectronics* 95 (2017) 8-14.
